# Supplementary material
Source: Springer Nature journal article supplement (https://www.springermedizin.de/resource/supplementary/12984_2008_201_MOESM12_ESM.pdf/9605518)

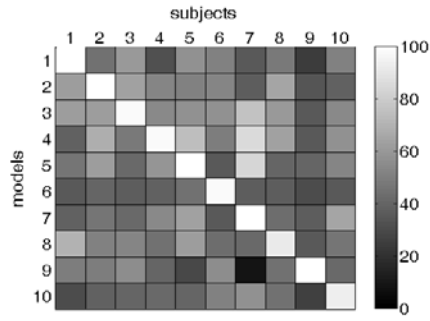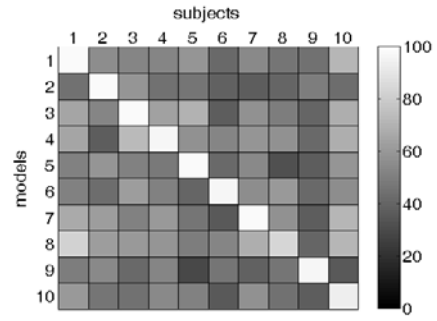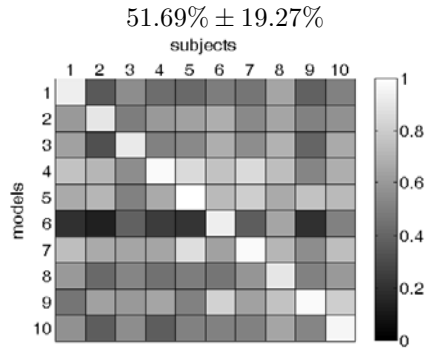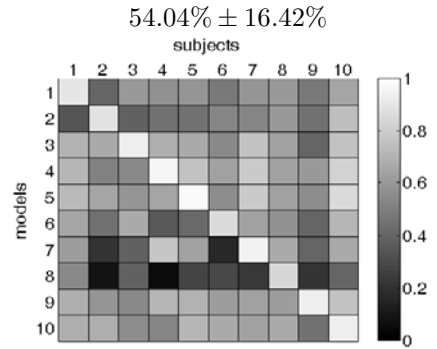

0.60 ± 0.18

0.58 ± 0.19

Supplement: MOESM12 [file 9605518]
